# Supplementary figures and images for: Genome-Wide Identification and Phylogenetic Analysis of TRP Gene Family Members in Saurian
Source: MDPI journal article supplement (doi:10.3390/ani12243593), 2022-12-19

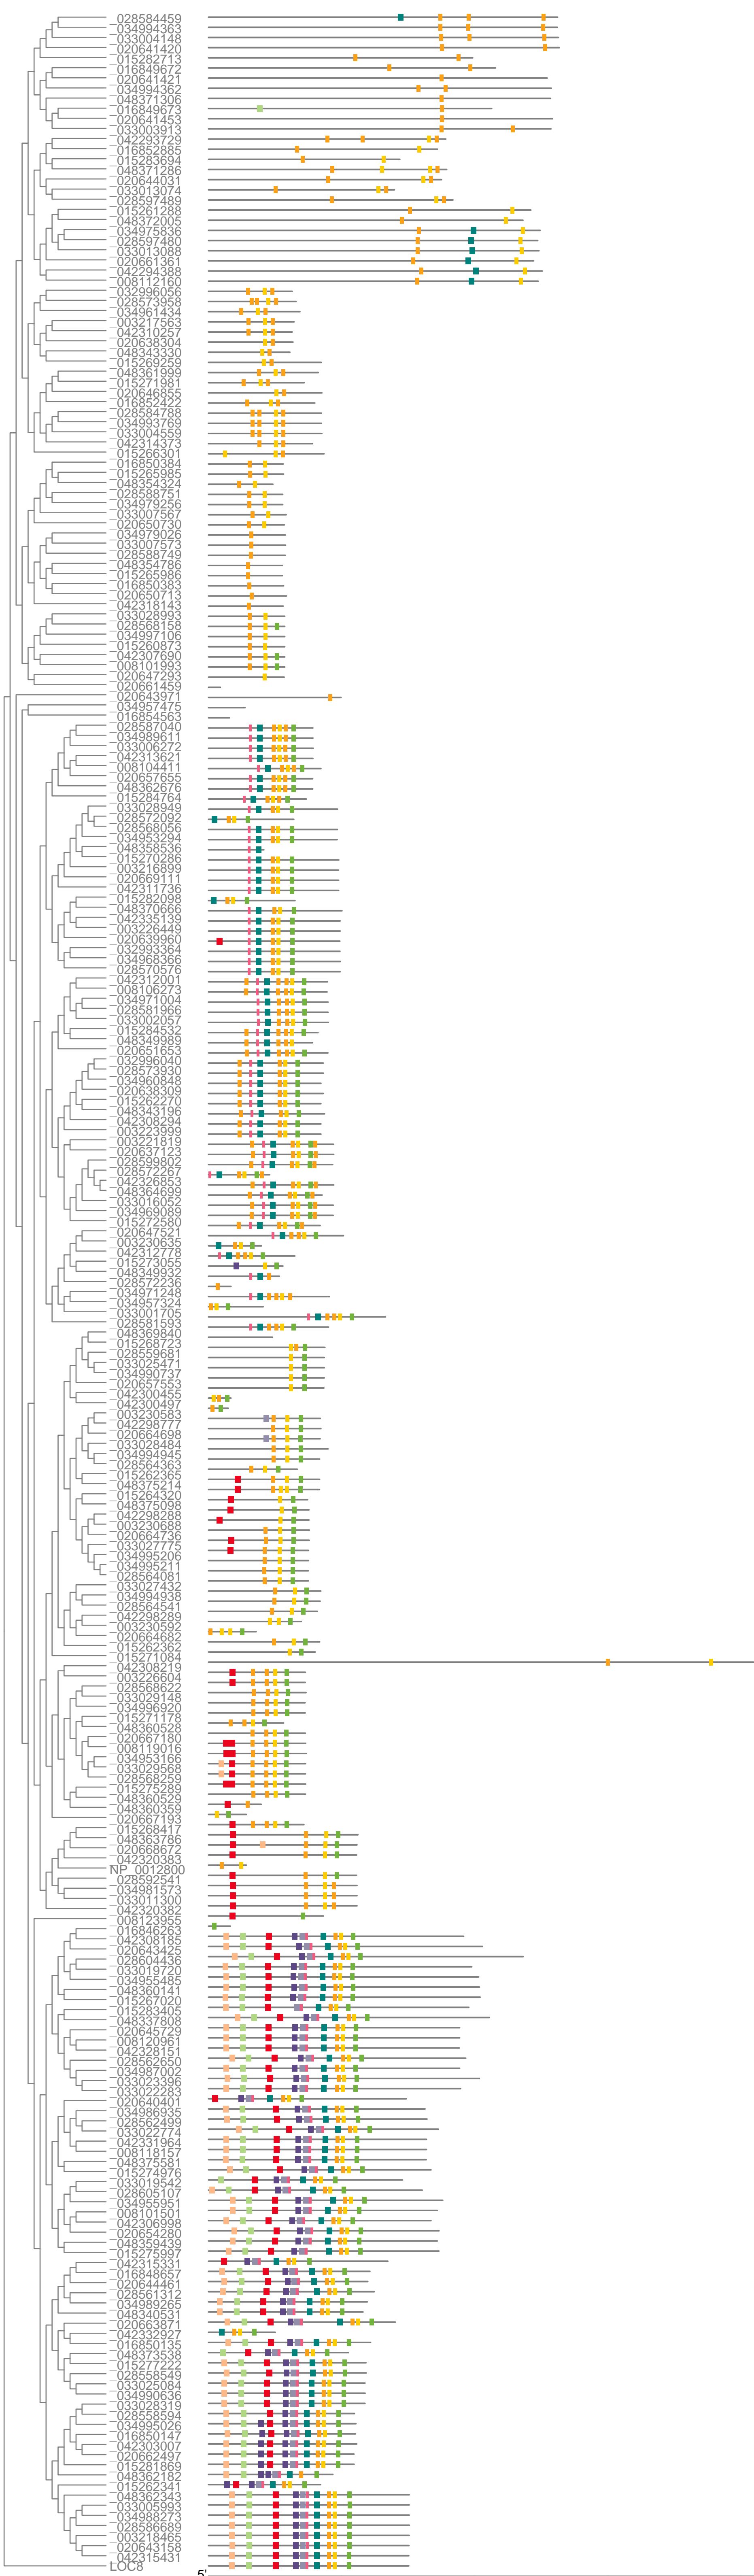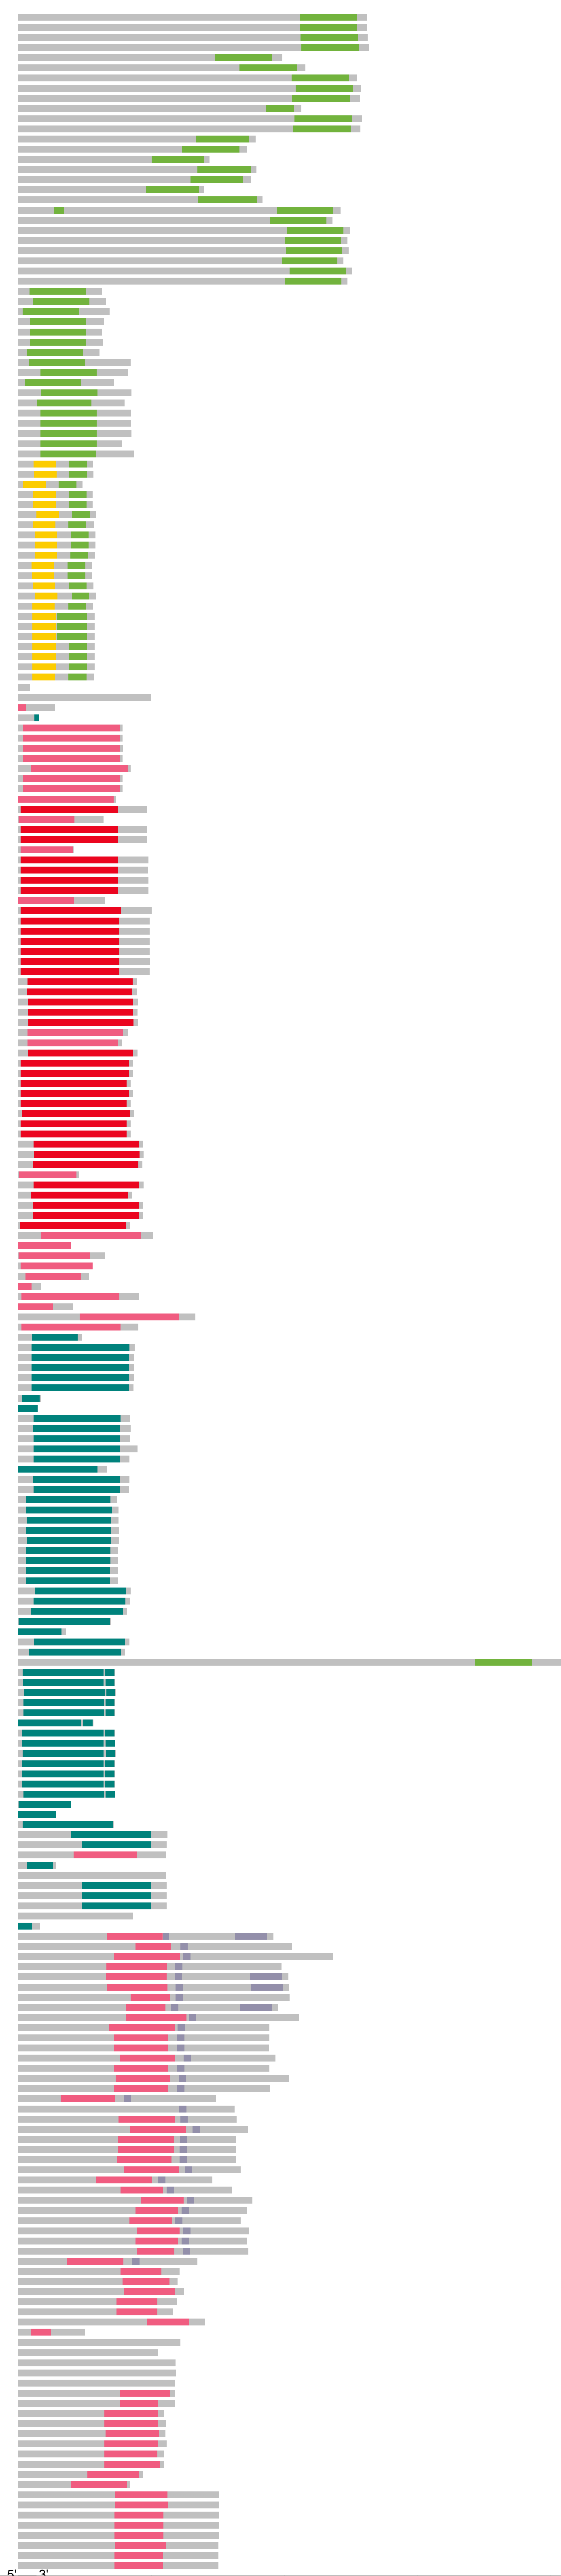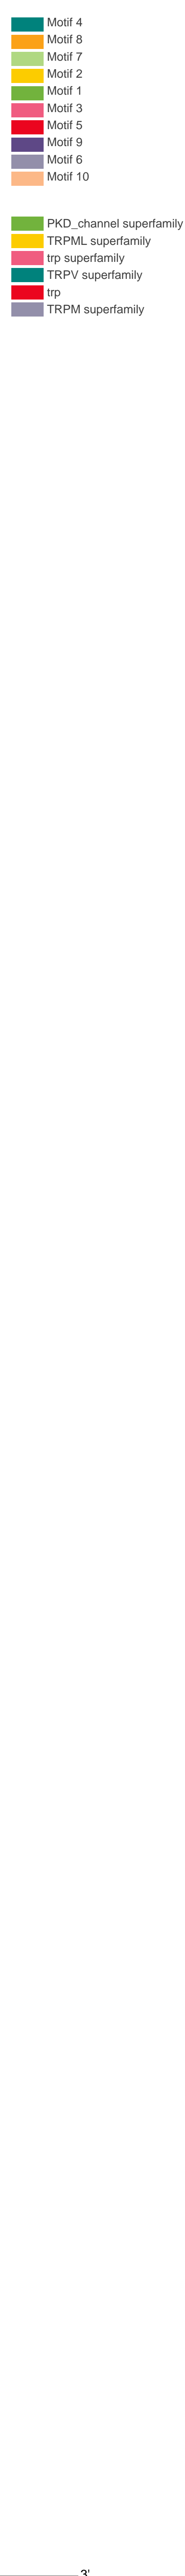

Supplement: s1 [file s1]

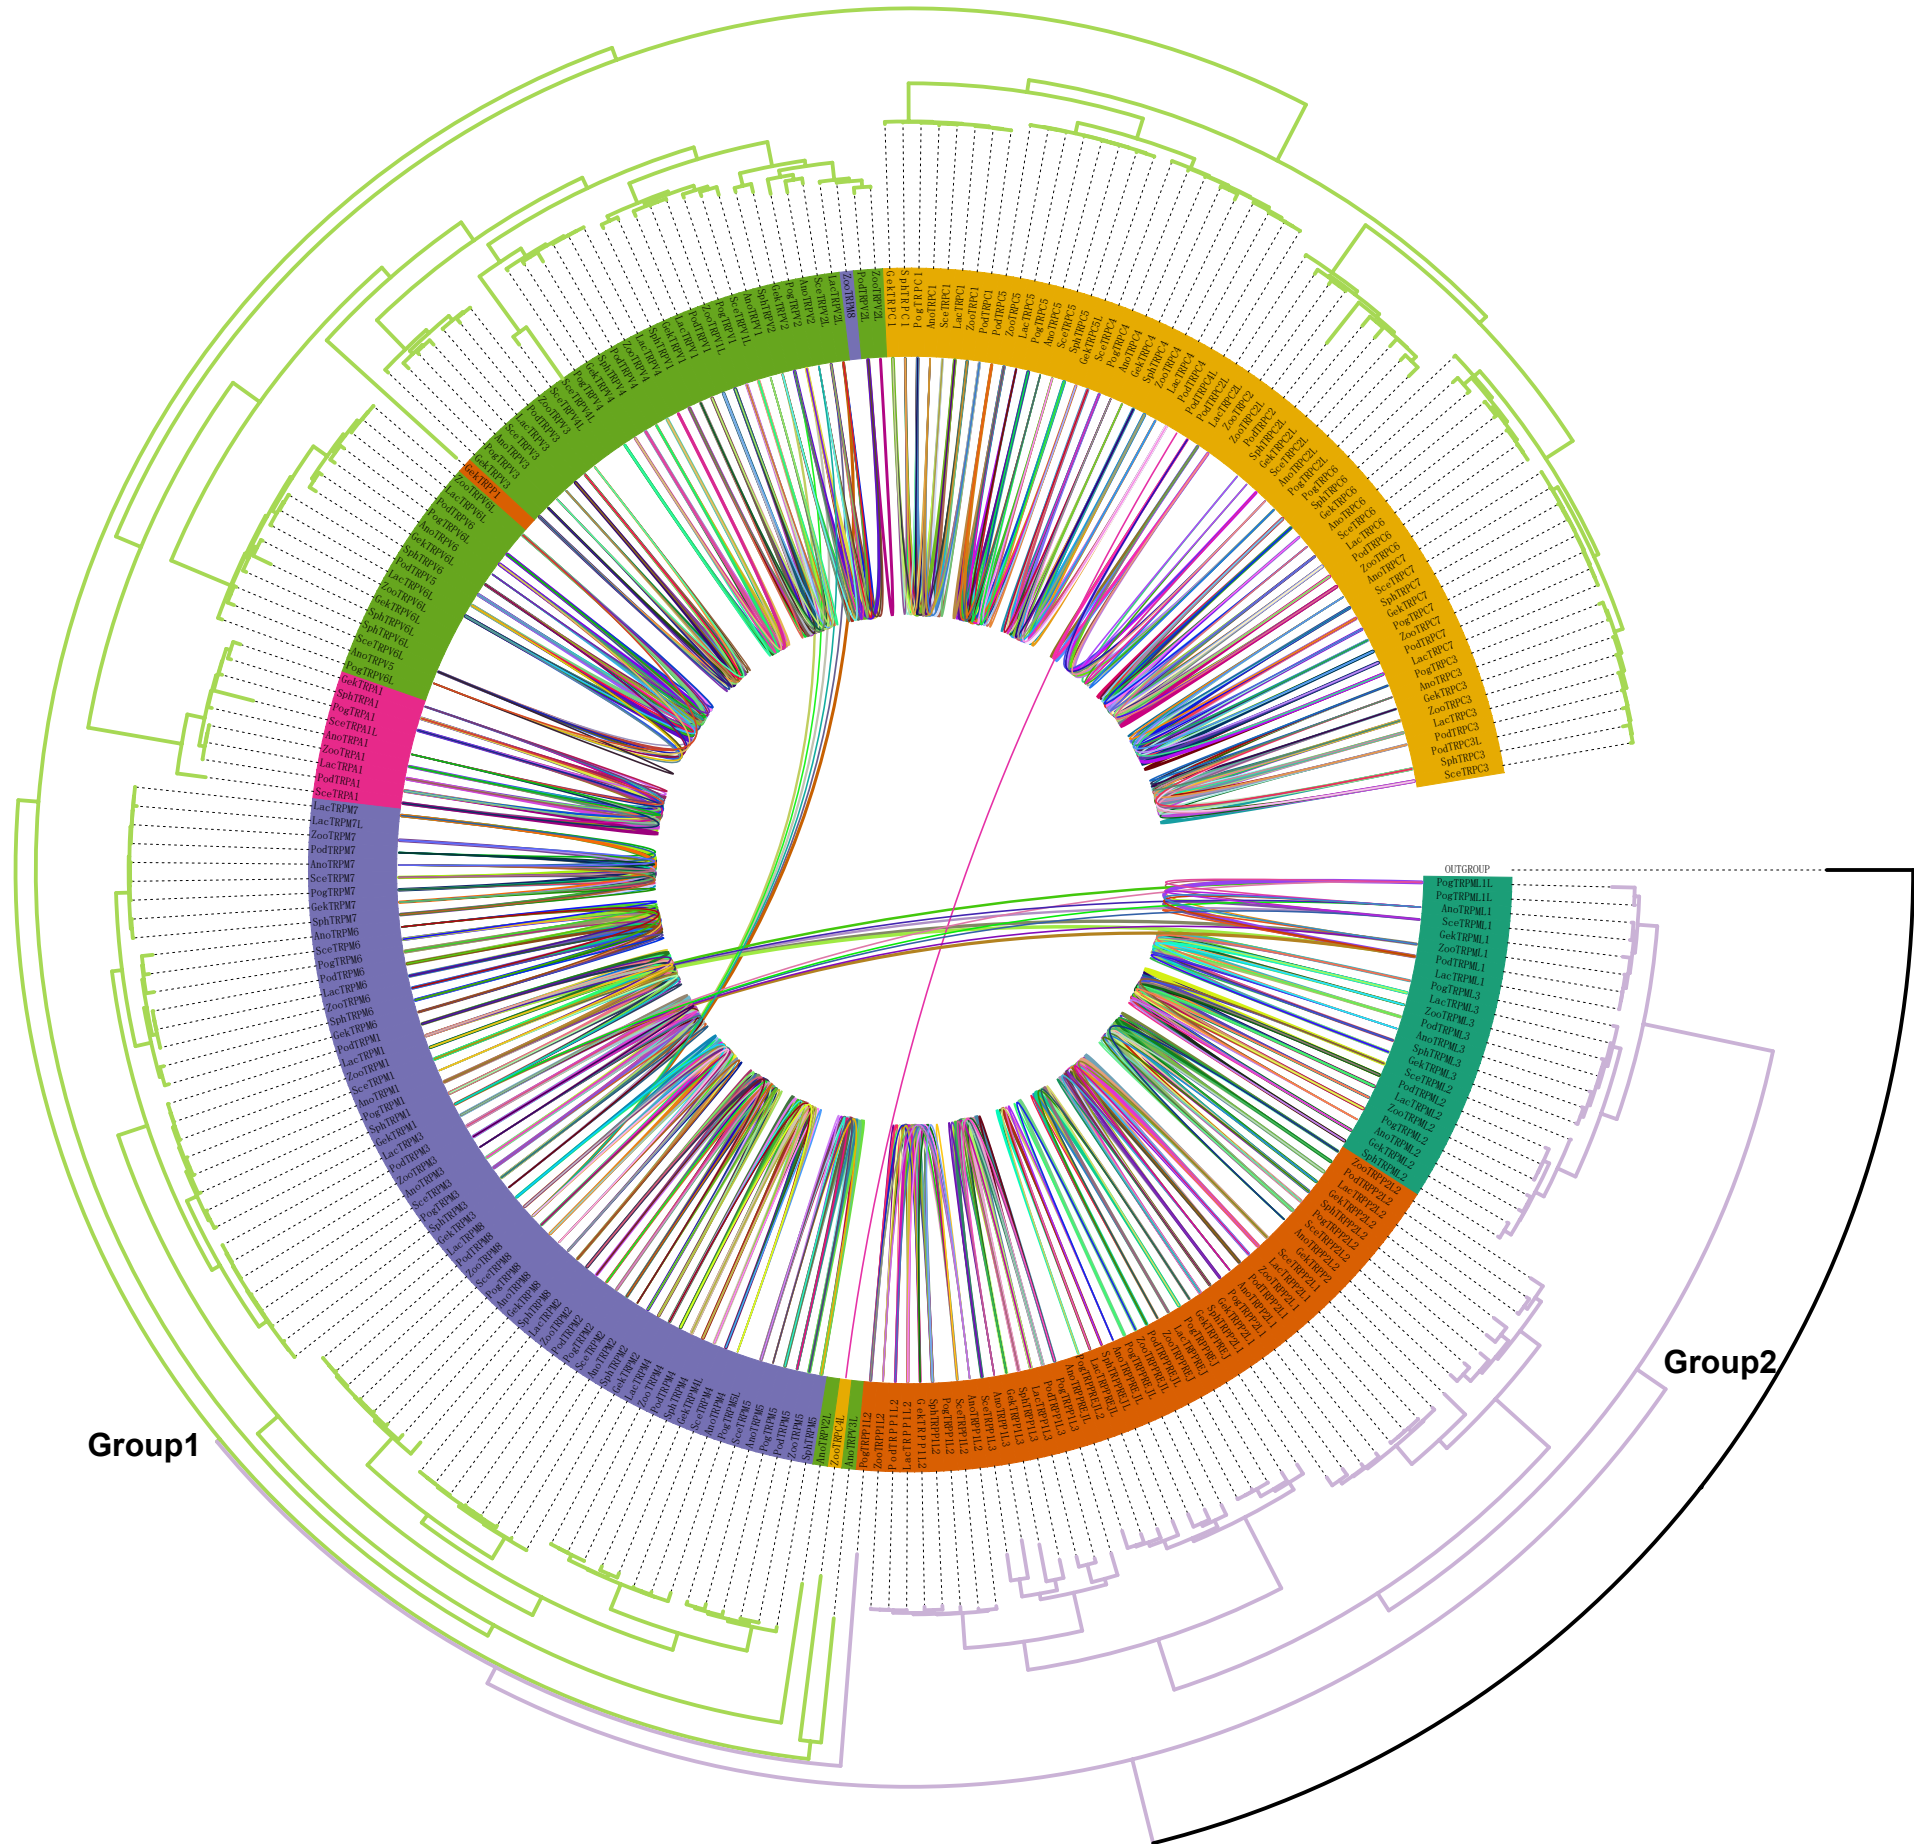

Supplement: s1 [file s1]

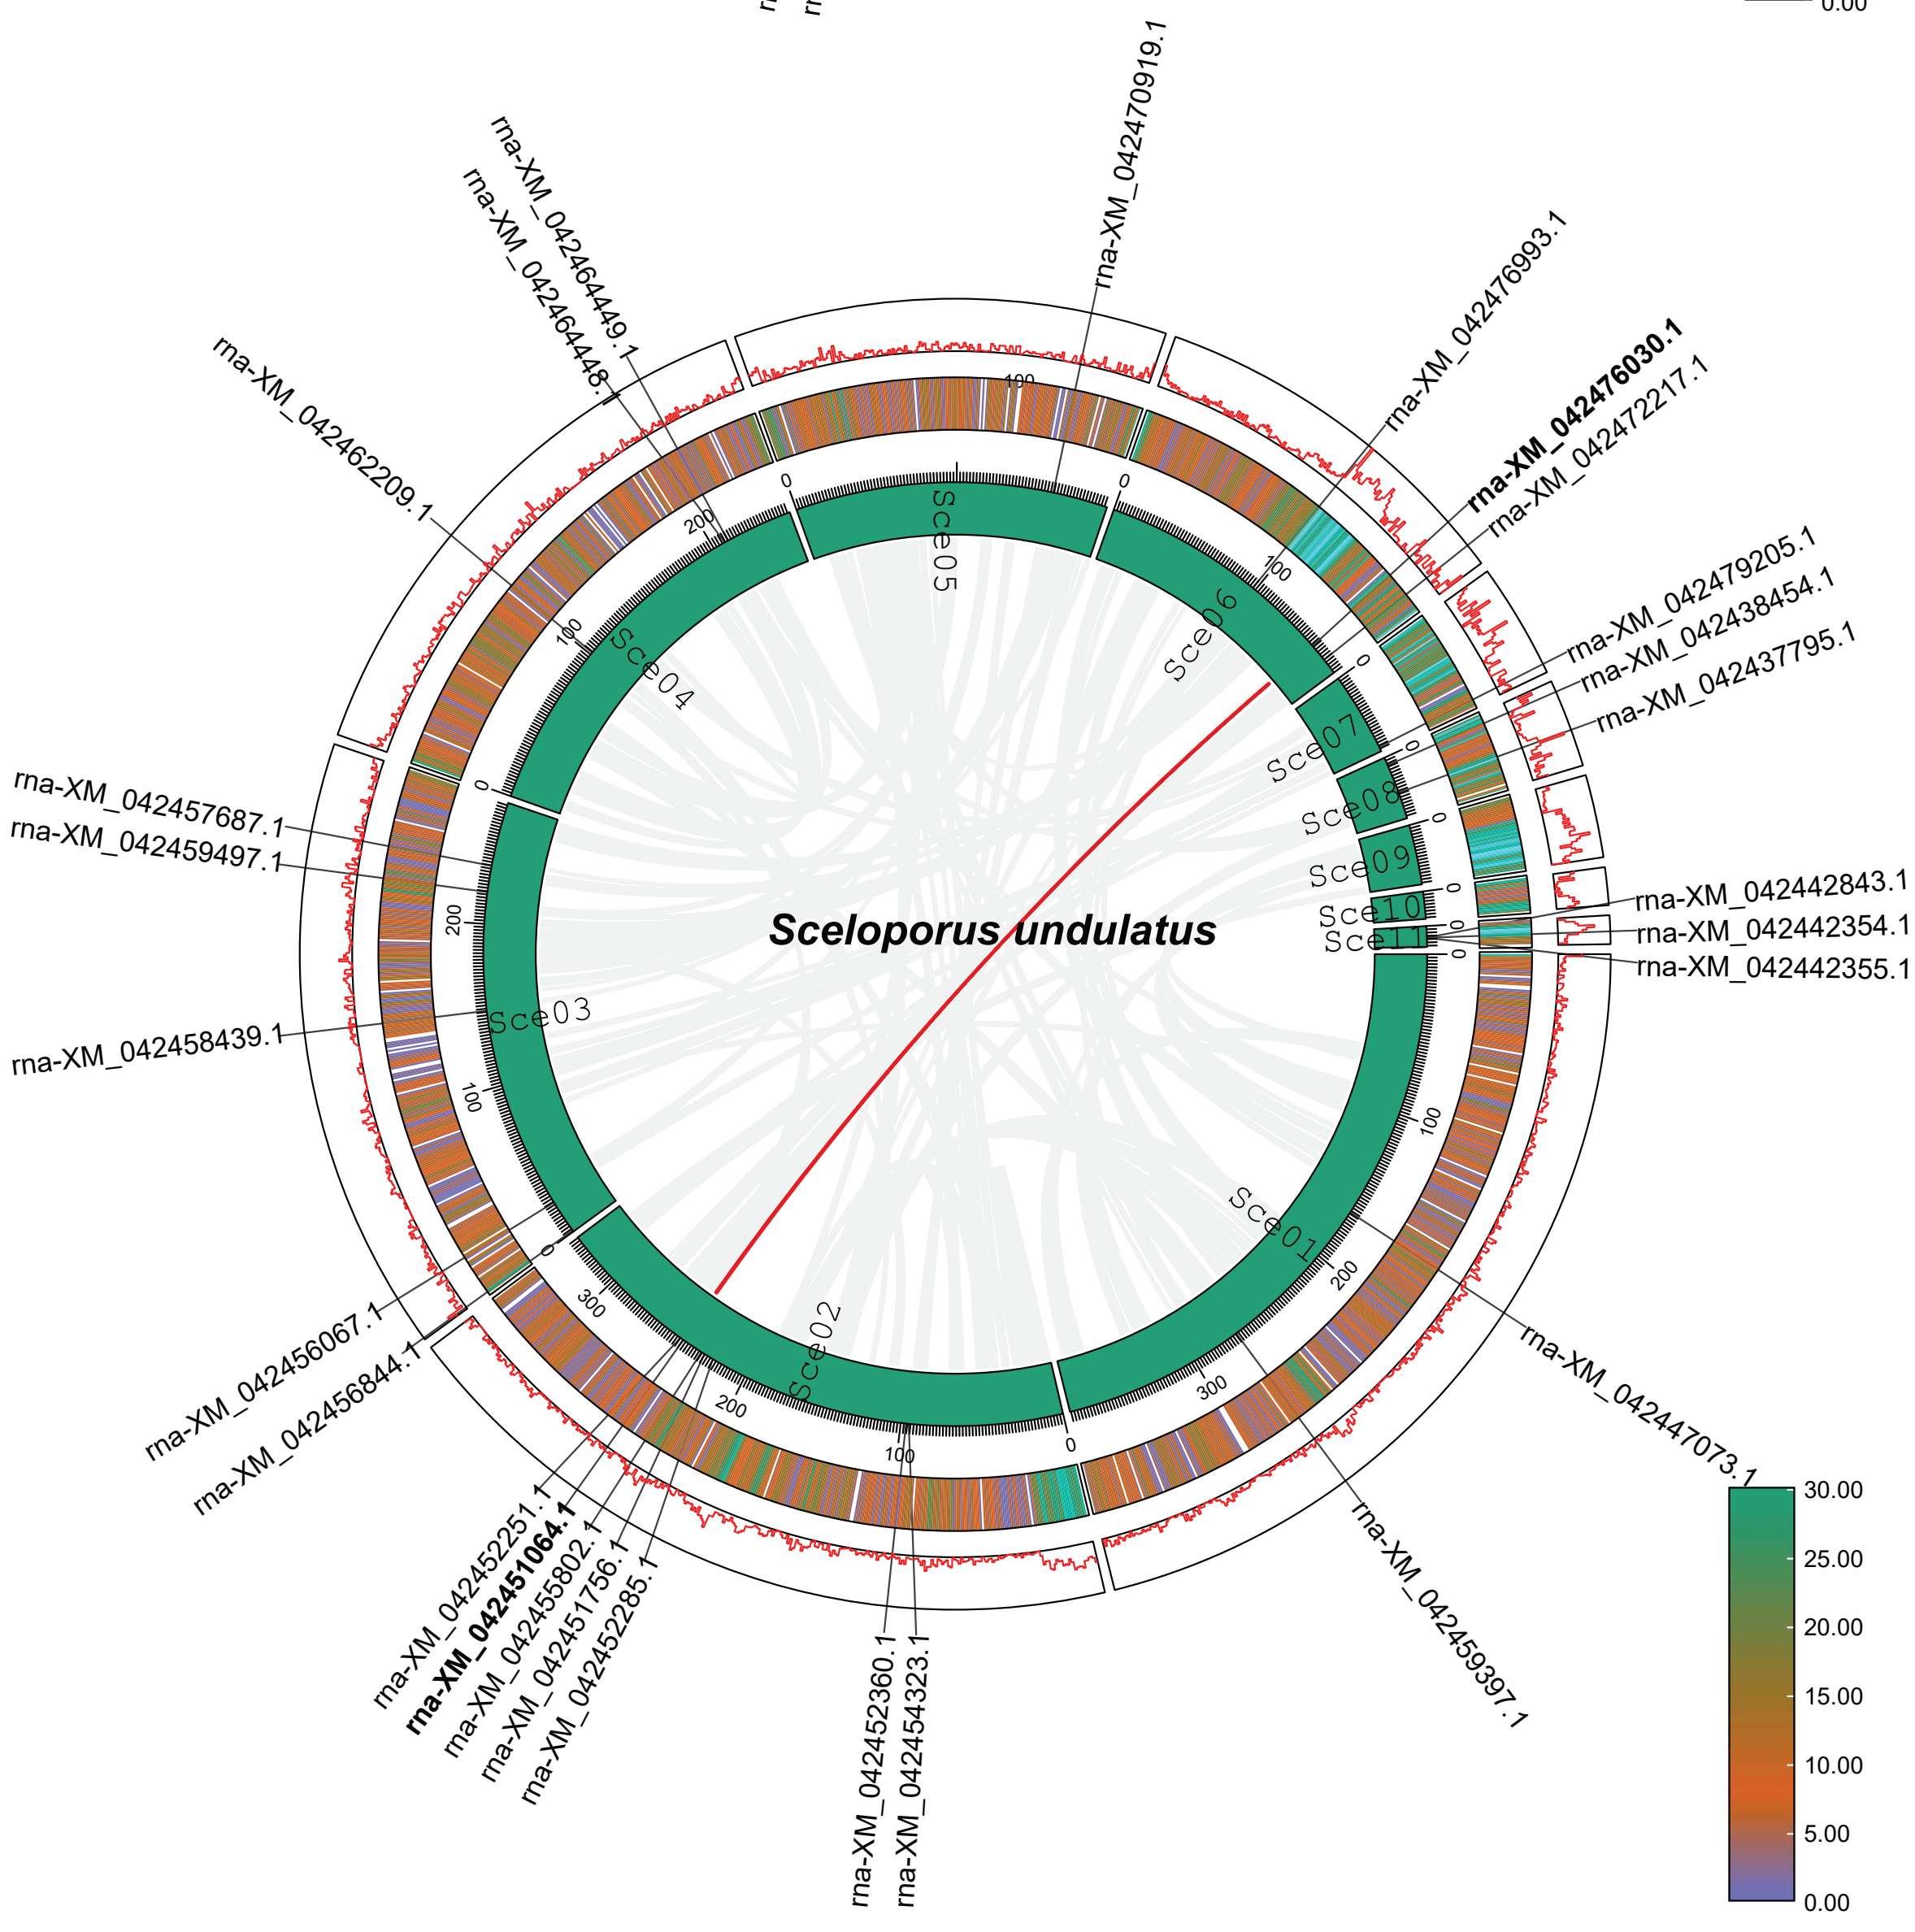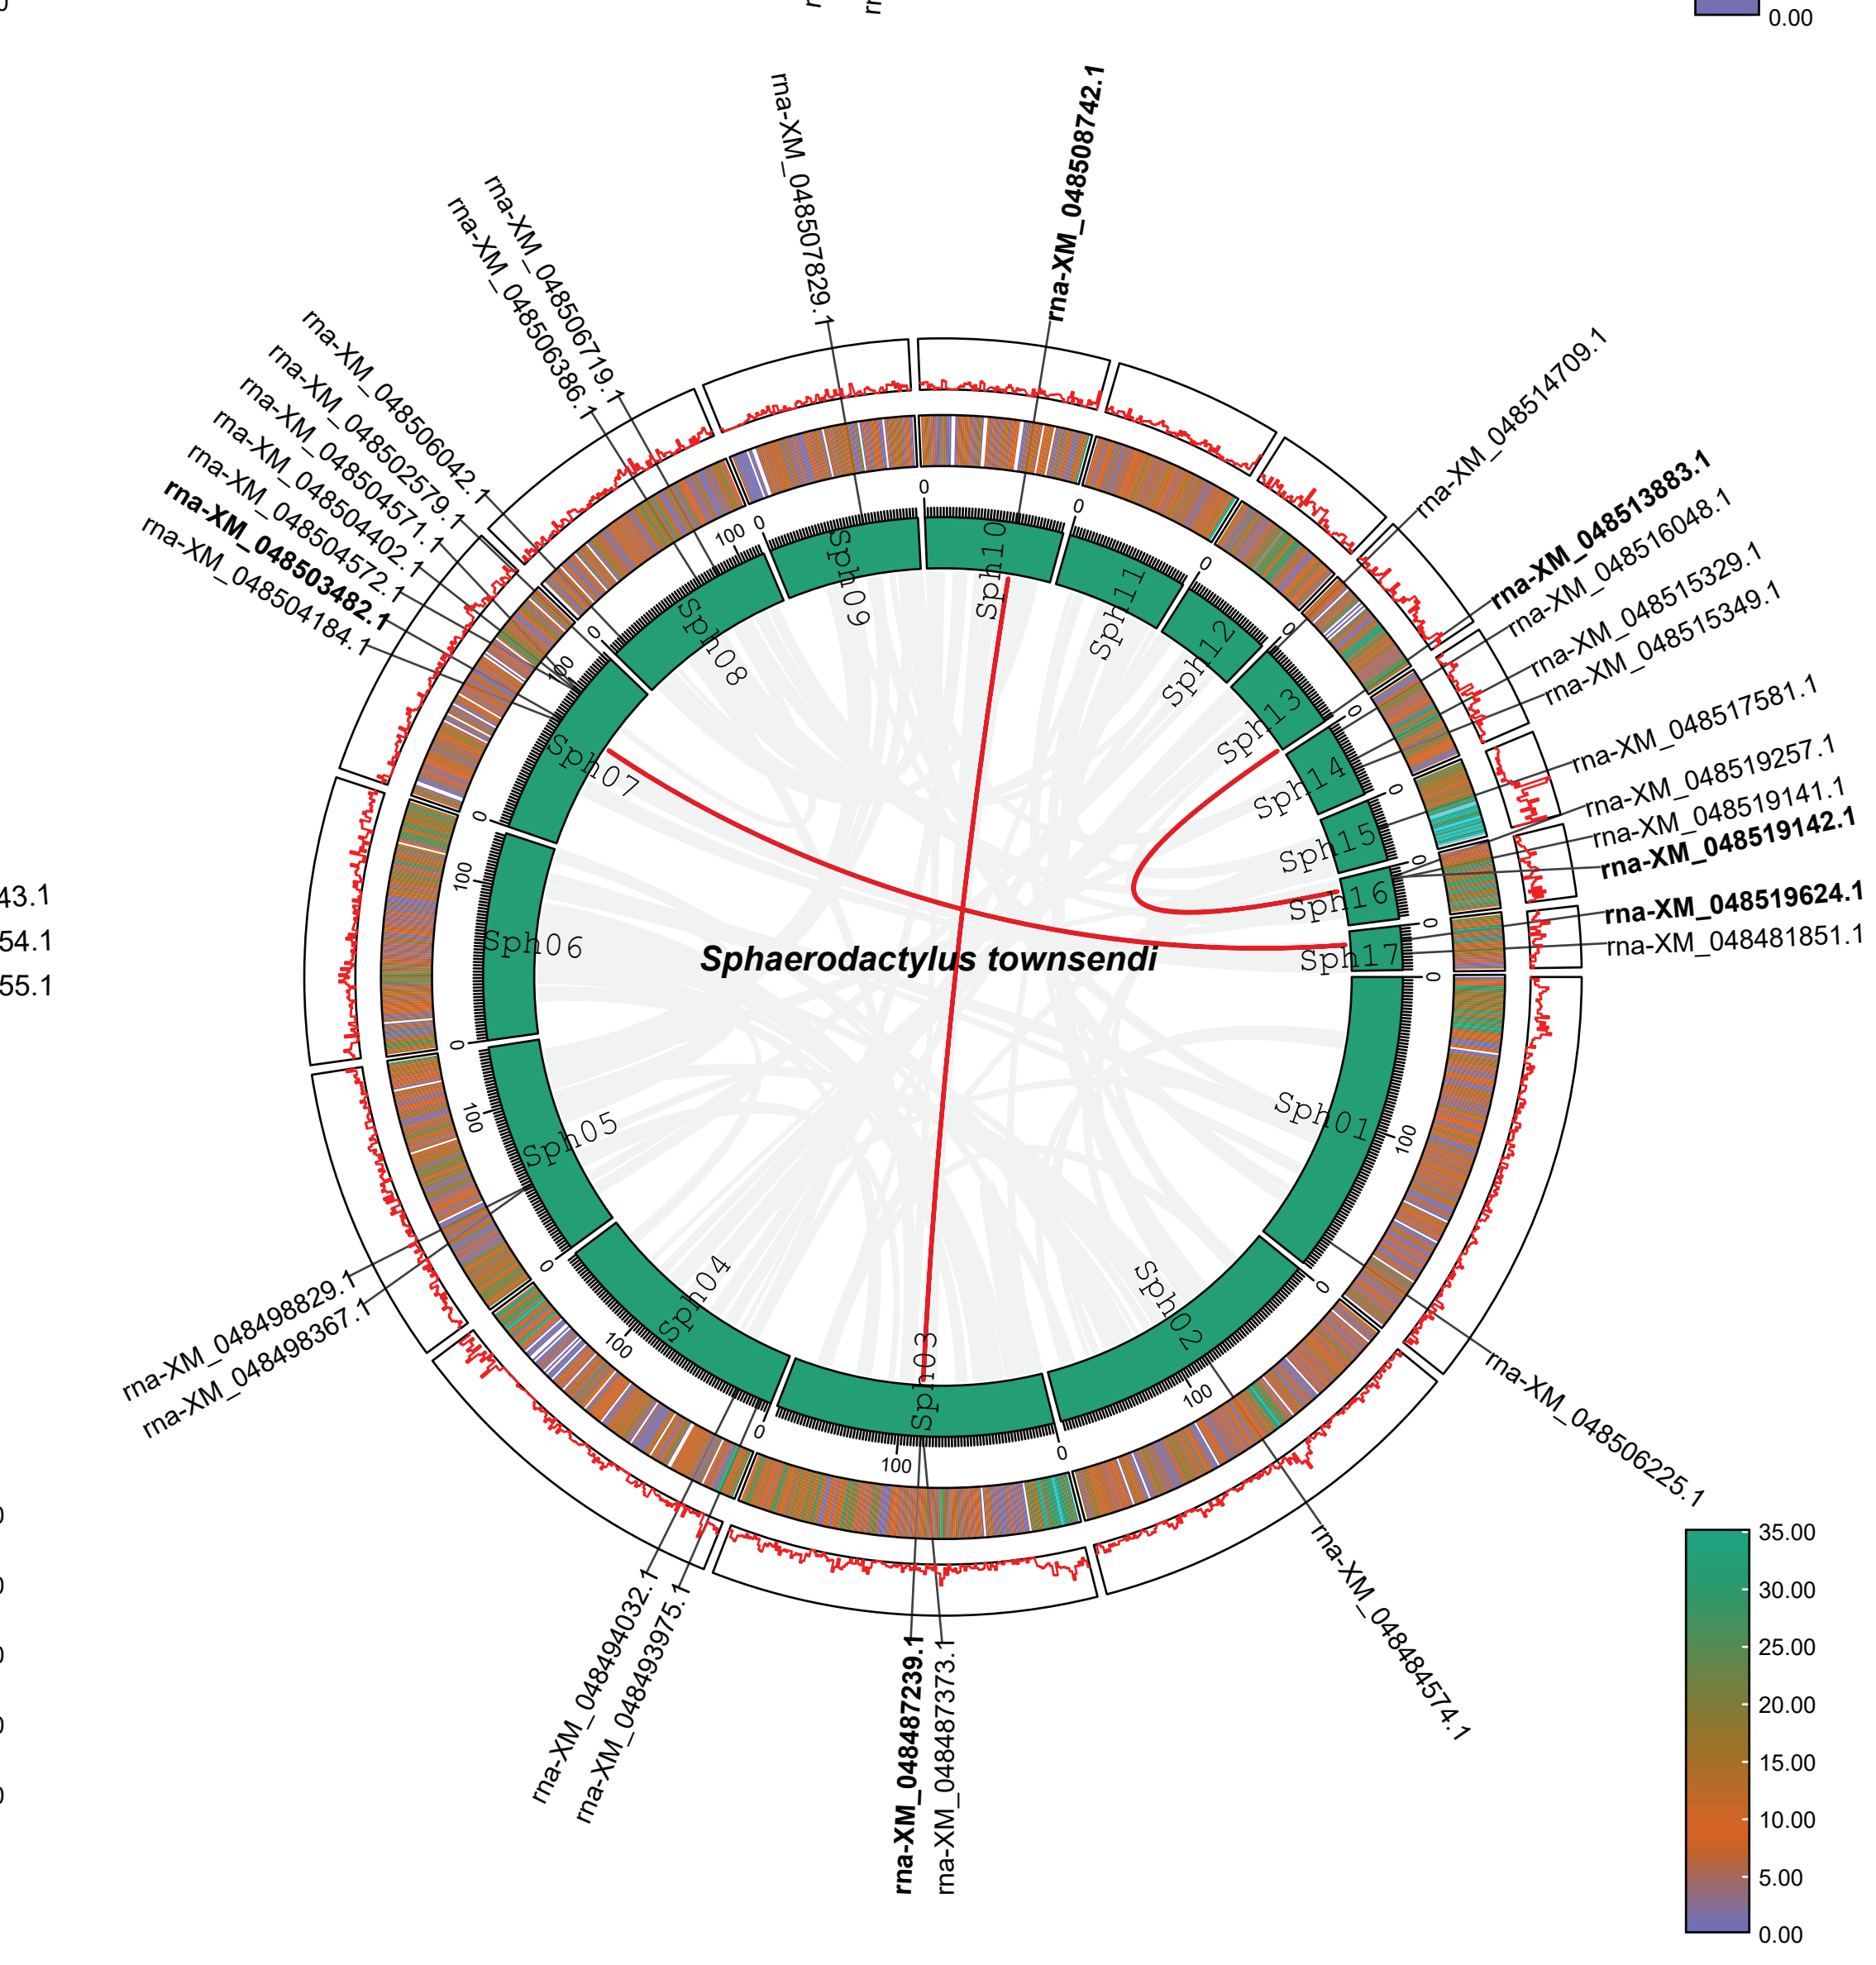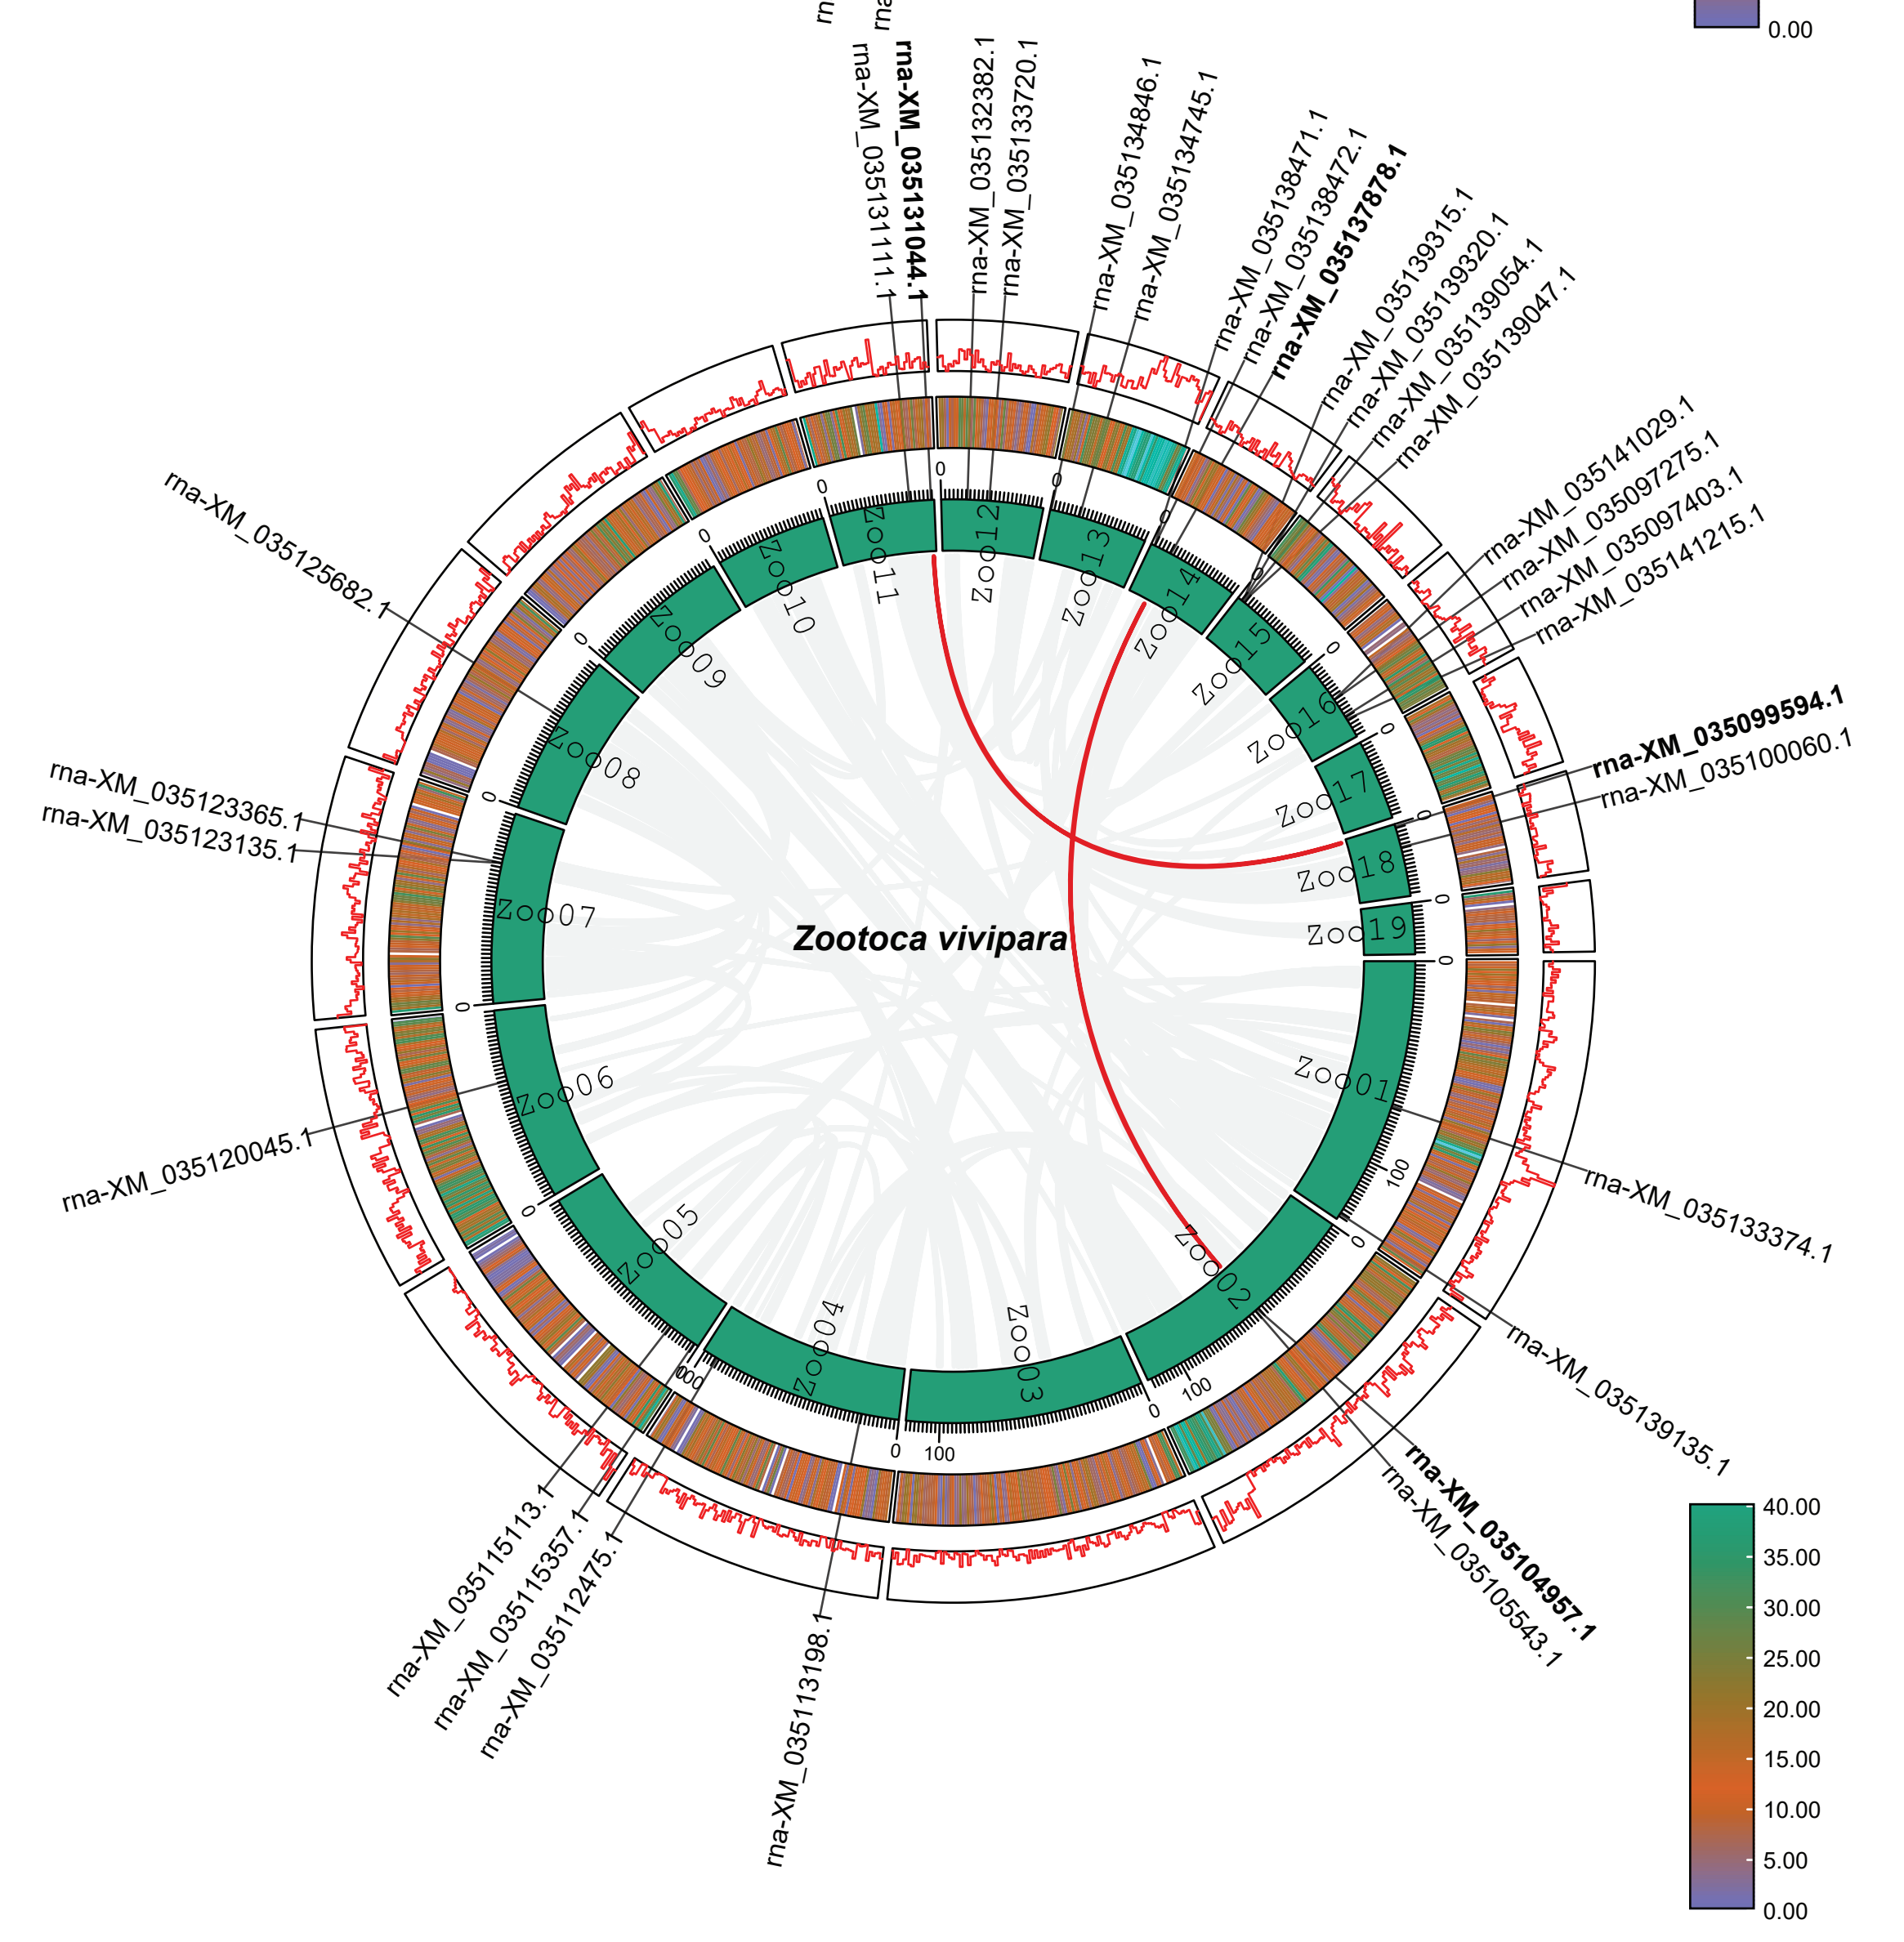

Supplement: s1 [file s1]
